# Supplementary material for: Beyond the classroom: How hidden curriculum dynamics shape professional identity formation in nursing undergraduates-Evidence from structural equation model
Source: Research Square preprint supplement (doi:10.21203/rs.3.rs-6399320/v1), 2025-05-09
Supplement: Supplementary file 1 [file 2cf190b52d13949b1dd3f2aa.docx]

| **Table 1**  Mean total and subdimension scores for HCAS-NE and PIQNS | | | | | | |
| --- | --- | --- | --- | --- | --- | --- |
| Scales | | | Number  of items | Theoretical  score range | Total score Mean ± SD | item score Mean ± SD |
| HCAS-NE | Subdimension | |  |  |  |  |
|  | HCAS1 | 7 | 7-35 | 17.78±4.99 | 2.54±0.71 |
|  | HCAS2 | 8 | 8-40 | 20.53±6.64 | 2.56±0.83 |
|  | HCAS3 | 8 | 8-40 | 19.73±5.73 | 2.47±0.71 |
|  | HCAS4 | 12 | 12-60 | 28.43±9.05 | 2.37±0.75 |
| Total | | 35 | 35-175 | 86.47±23.27 | 2.47±0.66 |
| PIQNS | Subdimension | |  |  |  |  |
|  | PIQNS1 | 6 | 6-30 | 21.09±4.22 | 3.51±0.70 |
|  | PIQNS2 | 4 | 4-20 | 13.72±3.03 | 3.43±0.76 |
|  | PIQNS3 | 3 | 3-15 | 10.27±2.35 | 3.42±0.78 |
|  | PIQNS4 | 2 | 2-10 | 7.19±1.66 | 3.59±0.83 |
|  | PIQNS5 | 2 | 2-10 | 7.23±1.80 | 3.62±0.90 |
| Total | | 17 | 17-85 | 59.50±11.27 | 3.50±0.66 |

| **Table 2**  Differences in participant characteristics, HCAS-NE and PIQNS | | | | | | | | | | | |
| --- | --- | --- | --- | --- | --- | --- | --- | --- | --- | --- | --- |
|  | HCAS-NE  total score | HCAS-NE subdimensions | | | | PIQNS total score | PIQNS subdimensions | | | | |
| HCAS1 | HCAS2 | HCAS3 | HCAS4 | PIQNS1 | PIQNS2 | PIQNS3 | PIQNS4 | PIQNS5 |
| Family members  with medical  background |  |  |  |  |  |  |  |  |  |  |  |
| Yes | 90.10±25.27 | 18.55±5.35 | 21.36±7.12 | 20.32±5.85 | 29.86±9.63 | 62.20±11.84 | 22.06±4.41 | 14.31±3.08 | 10.63±2.48 | 7.53±1.72 | 7.66±1.76 |
| No | 85.08±22.33 | 17.48±4.81 | 20.21±6.43 | 19.51±5.67 | 27.89±8.78 | 58.47±10.89 | 20.72±4.09 | 13.49±2.99 | 10.14±2.29 | 7.06±1.62 | 7.07±1.79 |
| Statistical values | *t*=2.409 *p*=0.017 | *t*=2.539 *p*=0.011 | *t*=1.954 *p*=0.052 | *t*=1.682 *p*=0.093 | *t*=2.469 *p*=0.014 | *t*=3.783 *p<*0.001 | *t*=3.638 *p<0.001* | *t*=3.214 *p*<0.001 | *t*=2.414 *p*=0.016 | *t*=3.374 *p*<0.001 | *t*=3.912 *p*<0.001 |
| Class level |  |  |  |  |  |  |  |  |  |  |  |
| 1st year | 81.96±21.52 | 16.83±4.84 | 19.36±5.99 | 18.83±5.19 | 26.94±8.15 | 54.78±11.07 | 19.56±4.10 | 12.23±2.94 | 9.43±2.21 | 6.71±1.49 | 6.85±1.71 |
| 2nd year | 81.89±17.22 | 18.19±5.30 | 18.92±5.02 | 18.49±4.77 | 26.30±7.60 | 57.54±9.86 | 20.43±3.80 | 13.31±2.63a | 9.69±2.12 | 6.99±1.49 | 7.13±1.59 |
| 3rd year | 92.42±25.33ab | 18.07±4.63 | 22.50±7.64ab | 21.14±6.24ab | 30.72±9.75ab | 62.70±11.37ab | 22.04±4.41ab | 14.82±2.93ab | 10.97±2.44ab | 7.50±1.83ab | 7.37±1.95a |
| 4th year | 86.96±25.12 | 17.83±5.18 | 20.51±6.54c | 19.85±5.92 | 28.77±9.45 | 61.19±10.94ab | 21.77±4.02ab | 13.95±3.02ac | 10.63±2.23ab | 7.37±1.63a | 7.48±1.82a |
| Statistical values | **F*=9.139  *p*<0.001 | *F*=2.373 *p*=0.069 | **F*=10.912  *p*<0.001 | **F*=8.332  *p*<0.001 | **F*=90396  *p*<0.001 | *F*=18.410 *p<*0.001 | **F*=13.195  *p*<0.001 | *F*=24.643 *p<*0.001 | *F*=18.366 *p<*0.001 | **F*=8.501  *p*<0.001 | **F*=3.963  *p*=0.008 |
| Served as a  student leader |  |  |  |  |  |  |  |  |  |  |  |
| Yes | 98.74±27.97 | 19.81±5.35 | 23.56±7.39 | 22.65±6.68 | 32.73±10.33 | 67.55±12.13 | 23.78±4.53 | 15.61±2.95 | 11.81±2.50 | 8.15±1.65 | 8.20±1.85 |
| No | 84.08±21.46 | 17.38±4.82 | 19.94±6.33 | 19.17±5.35 | 27.60±8.55 | 57.93±10.41 | 20.56±3.96 | 13.35±2.91 | 9.97±2.20 | 7.00±1.60 | 7.05±1.73 |
| Statistical values | *t*=5.277 *p<*0.001 | *t*=4.797 *p<*0.001 | *t*=4.874 *p<*0.001 | *t*=5.222 *p<*0.001 | *t*=4.966 *p<*0.001 | *t*=7.881 *p<*0.001 | *t*=7.032 *p<0.001* | *t*=7.538 *p*<0.001 | *t*=7.259 *p*=0.016 | *t*=6.969 *p*<0.001 | *t*=6.421 *p*<0.001 |

*: Welch test (heterogeneity of variance).

a: vs. 1st year, p<0.05; b: vs. 2nd year, *p*<0.05; c: vs. 3rd year, *p*<0.05.

| **Table 3**  Relationship between HCAS-NE and PIQNS | | | | | | | | |
| --- | --- | --- | --- | --- | --- | --- | --- | --- |
| Scales | | | PIQNS | | | | | |
| Total score | Subdimension | | | | |
| PIQNS1 | PIQNS2 | PIQNS3 | PIQNS4 | PIQNS5 |
| HCAS-NE | Total score |  | *r*=0.628 *p*<0.001 | *r*=0.588 *p*<0.001 | *r*=0.556 *p*<0.001 | *r*=0.557 *p*<0.001 | *r*=0.487 *p*<0.001 | *r*=0.437 *p*<0.001 |
| Subdimension | HCAS1 | *r*=0.482 *p*<0.001 | *r*=0.455 *p*<0.001 | *r*=0.424 *p*<0.001 | *r*=0.404 *p*<0.001 | *r*=0.380 *p*<0.001 | *r*=0.357 *p*<0.001 |
|  | HCAS2 | *r*=0.568 *p*<0.001 | *r*=0.536 *p*<0.001 | *r*=0.498 *p*<0.001 | *r*=0.512 *p*<0.001 | *r*=0.429 *p*<0.001 | *r*=0.398 *p*<0.001 |
|  | HCAS3 | *r*=0.586 *p*<0.001 | *r*=0.543 *p*<0.001 | *r*=0.519 *p*<0.001 | *r*=0.517 *p*<0.001 | *r*=0.470 *p*<0.001 | *r*=0.411 *p*<0.001 |
|  | HCAS4 | *r*=0.561 *p*<0.001 | *r*=0.524 *p*<0.001 | *r*=0.503 *p*<0.001 | *r*=0.505 *p*<0.001 | *r*=0.431 *p*<0.001 | *r*=0.375 *p*<0.001 |

*r*=correlation coefficient

| **Table 4** Multiple linear regression analysis of the predictors of PIQNS | | | | | | |
| --- | --- | --- | --- | --- | --- | --- |
| Variables | Unstandardized  coefficients B | standard  error | standardized  coefficients β | *t* | 95%CI | *p* |
|  | *R*=0.674, *R2*=0.454, *R2*(adj)=0.449, *F*=95.118, *p*<0.001 | | | | |  |
| (Constant) | 30.094 | 2.094 | - | 14.375 | 25.984~34.205 | <0.001 |
| HCAS-NE | 0.270 | 0.014 | 0.557 | 18.893 | 0.242~0.298 | <0.001 |
| Served as a  student leader | 4.946 | 0.893 | 0.162 | 5.540 | 3.193~6.699 | <0.001 |
| Class level |  |  |  |  |  |  |
| 2nd-1st year | 3.045 | 0.964 | 0.113 | 3.159 | 1.152-4.937 | 0.002 |
| 3rd-1st year | 4.772 | 0.913 | 0.196 | 5.225 | 2.978-6.565 | <0.001 |
| 4th-1st year | 4.530 | 0.946 | 0.175 | 4.789 | 2.673-6.388 | <0.001 |
| Family members  with medical background | -1.669 | 0.718 | -0.066 | -2.325 | -3.078~-0.269 | 0.020 |

Class level: Dummy Variable (reference group=1st year)

| **Table 5**  The SEM fit for Participant characteristics, HCAS-NE, and PIQNS | | | | |
| --- | --- | --- | --- | --- |
| Fit Assessment  Index | Forms | Model  Coefficient | Fit results | Reference |
| Absolute Fit Index | |  |  |  |
|  | NC | 2.117 | Good | Acceptable:<5,  Good:<3 |
|  | GFI | 0.966 | Good | Acceptable:>0.80  Good:>0.90 |
|  | AGFI | 0.954 | Good |
|  | RMSEA | 0.04 | Good | Acceptable:<0.10,  Good:<0.05 |
| Value-Added Fit Index | |  |  |  |
|  | NFI | 0.96 | Good | Acceptable:>0.80  Good:>0.90 |
|  | RFI | 0.951 | Good |
|  | IFI | 0.978 | Good |
|  | TLI | 0.974 | Good |
|  | CFI | 0.978 | Good |
| Simplicity Fit Index | |  |  |  |
|  | PNFI | 0.795 | Acceptable | Acceptable:>0.5 |
|  | PGFI | 0.701 | Acceptable |

| **Table 6**  Direct effects of each path in the model | | | | | |
| --- | --- | --- | --- | --- | --- |
| Path | Nonstandardized  regression coefficients | Standardized  regression coefficients | S.E. | C.R. | *P* |
| Participant characteristics →HCAS-NE | 15.293 | 0.526 | 13.135 | 1.164 | 0.244 |
| HCAS-NE→PIQNS | 0.531 | 0.422 | 0.091 | 5.840 | <0.001 |
| Participant characteristics →PIQNS | 18.421 | 0.504 | 15.731 | 1.171 |  |
